# Supplementary material for: Copper-based MOF, Cu3(SDBA)2(HSDBA), as a catalyst for efficient reduction of 4-nitrophenol in the presence of sodium borohydride
Source: Royal Society of Chemistry journal article supplement (doi:10.1039/d1re00506e), 2022-01-01
Supplement: d1re00506e1.pdf [file d1re00506e1.pdf]

# Supplementary information

## Copper-based MOF, $\text{Cu}_3(\text{SDBA})_2(\text{HSDBA})$ , as catalyst for efficient reduction of 4-nitrophenol in the presence of sodium borohydride

Manel Mansour<sup>1,2</sup>, Hamza Kahri<sup>3\*</sup>, Mouhieddine Guergueb<sup>4</sup>, Houcine Barhoumi<sup>3</sup>, Enrique Gutierrez Puebla<sup>2</sup>, Brahim Ayed<sup>1</sup>, Umit B. Demirci<sup>5\*</sup>

- 1 Laboratory Materials, Crystal Chemistry and Applied Thermodynamics, Faculty of Sciences of Monastir, University of Monastir, Monastir, Tunisia
  - 2 Materials Science Factory, Materials Science Institute of Madrid (CSIC), C/Sor Juana Ines de La Cruz, 3, Madrid, Spain
  - 3 Laboratory of Interfaces and Advanced Materials, Faculty of Sciences, University of Monastir, Tunisia
  - 4 University of Monastir, Laboratoire de Physico-Chimie des Matériaux, Faculté des Sciences de Monastir, Avenue de l'Environnement, 5019 Monastir, Tunisia
  - 5 IEM (Institut Européen des Membranes), UMR5635 (CNRS, ENSCM, UM), Université de Montpellier, Place Eugene Bataillon, CC047, Montpellier, France
- \* kahrihamza11@gmail.com; umit.demirci@umontpellier.fr

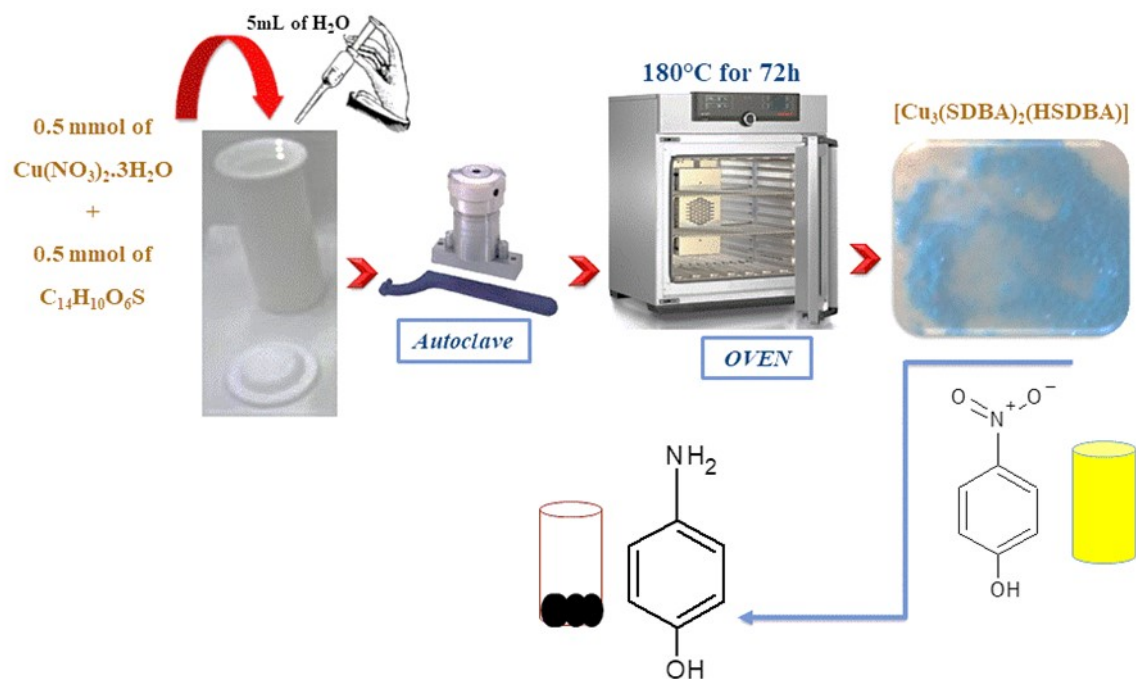

**Figure S1.** Schematic illustration of the synthesis of blue crystals of  $\text{Cu}_3(\text{SDBA})_2(\text{HSDBA})$ , and their use for the reduction of 4-nitrophenol into 4-aminophenol.

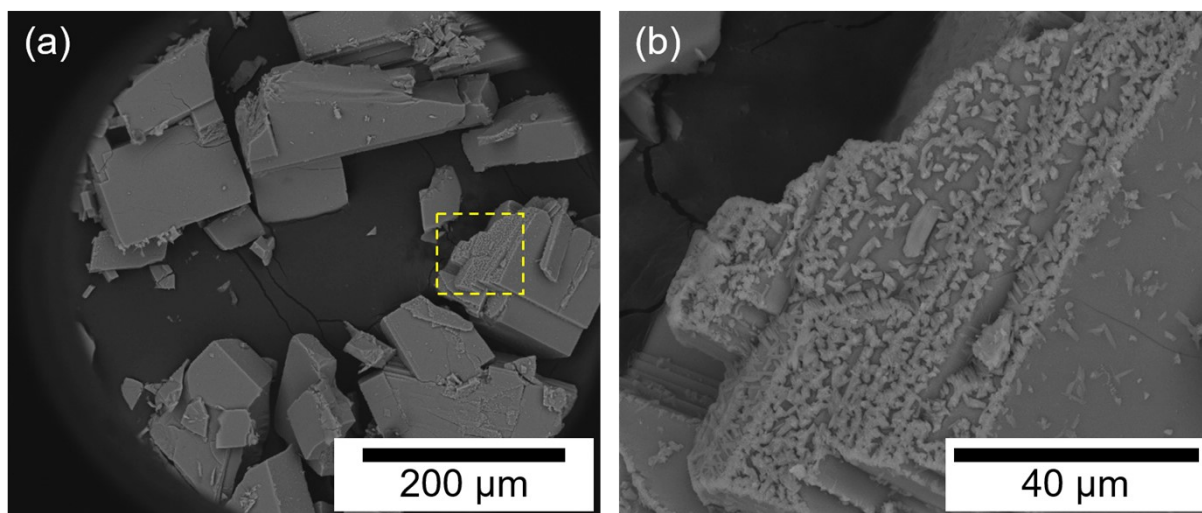

**Figure S2.** SEM images of  $\text{Cu}_3(\text{SDBA})_2(\text{HSDBA})$  at two different magnifications. These images are the same as those shown in Figure 1 but at two different magnifications. The image (b) shows a magnification of the area of the image (a) indicated by the yellow box.

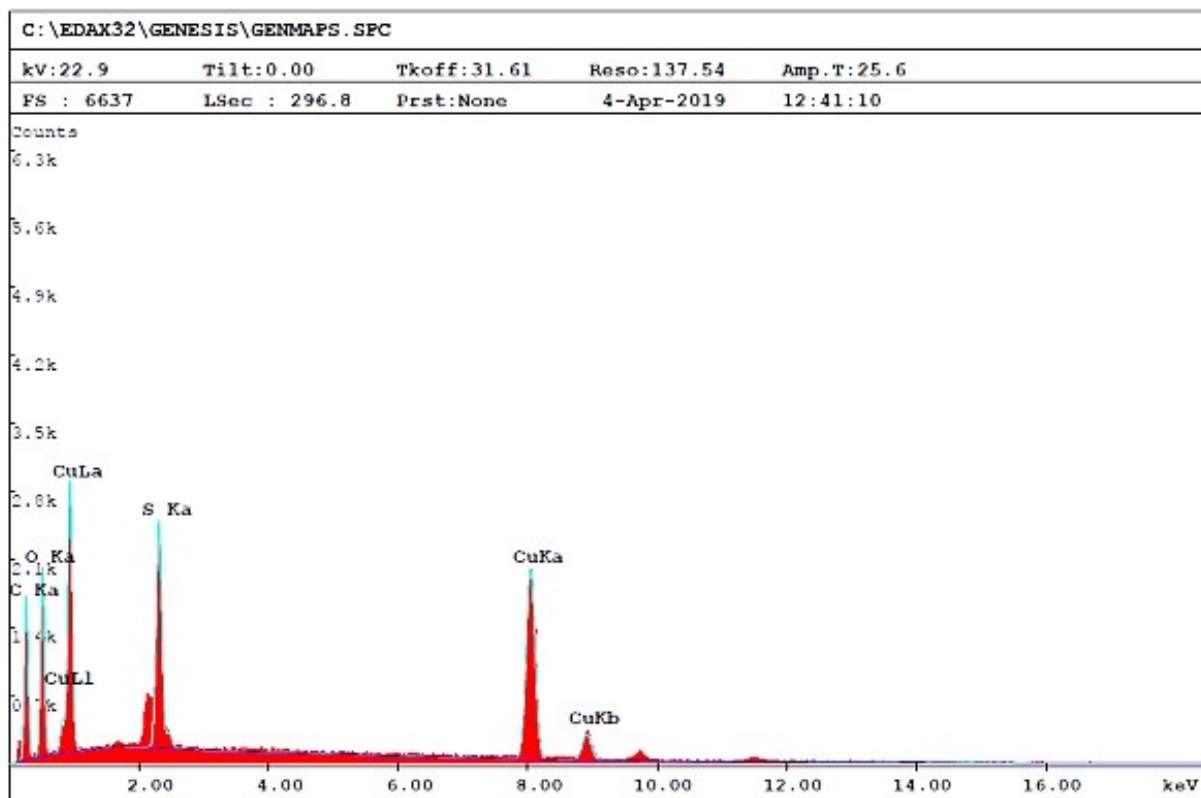

**Figure S3.** Energy dispersive X-ray spectrum of  $\text{Cu}_3(\text{SDBA})_2(\text{HSDBA})$ .

**Table S1.** Crystal data and refinement table.

| Parameters                                 | [Cu <sub>3</sub> (SDBA) <sub>2</sub> (HSDBA)]                                  |
|--------------------------------------------|--------------------------------------------------------------------------------|
| CCDC deposit No.                           | 1956263                                                                        |
| Empirical formula                          | C <sub>42</sub> H <sub>25</sub> Cu <sub>3</sub> O <sub>19</sub> S <sub>3</sub> |
| Formula weight g/mol                       | 2175.40                                                                        |
| Temperature (K)                            | 296                                                                            |
| Wavelength (Å)                             | 1.54178                                                                        |
| Crystal system                             | Triclinic                                                                      |
| Space group                                | <i>P</i> -1                                                                    |
| <i>a</i> (Å)                               | 12.5482(7)                                                                     |
| <i>b</i> (Å)                               | 12.6669(9)                                                                     |
| <i>c</i> (Å)                               | 15.7079(8)                                                                     |
| α (°)                                      | 106.396(4)                                                                     |
| β (°)                                      | 91.917(3)                                                                      |
| γ (°)                                      | 119.522 (4)                                                                    |
| Volume (Å <sup>3</sup> )                   | 2039.2(2)                                                                      |
| <i>Z</i>                                   | 2                                                                              |
| Density (Mg m <sup>-3</sup> )              | 1.771                                                                          |
| Absorption coefficient (mm <sup>-1</sup> ) | 3.742                                                                          |
| <i>F</i> <sub>000</sub>                    | 1097                                                                           |
| Crystal size (mm <sup>3</sup> )            | 0.02 × 0.02 × 0.01                                                             |
| θ range for data collection                | 3.00° to 65.42°                                                                |
| Index ranges                               | -14 ≤ <i>h</i> ≤ 14<br>-14 ≤ <i>k</i> ≤ 14<br>-16 ≤ <i>l</i> ≤ 18              |
| Reflections collected                      | 16003                                                                          |
| Unique reflections                         | 6522 [R <sub>int</sub> = 0.0620]                                               |
| Absorption correction                      | multi-scan                                                                     |
| Refinement method                          | Full matrix least-squares on <i>F</i> <sup>2</sup>                             |
| Data/restraints/parameters                 | 6522 / 0 / 601                                                                 |
| Goodness-of-fit on <i>F</i> <sup>2</sup>   | 1.070                                                                          |
| Final [ <i>I</i> > 2σ( <i>I</i> )]         | R <sub>1</sub> = 0.0877, wR <sub>2</sub> = 0.2440                              |
| R indices (all data)                       | R <sub>1</sub> = 0.2440, wR <sub>2</sub> = 0.2647                              |
| Largest diff. peak and hole                | 0.727 and -0.927e Å <sup>-3</sup>                                              |

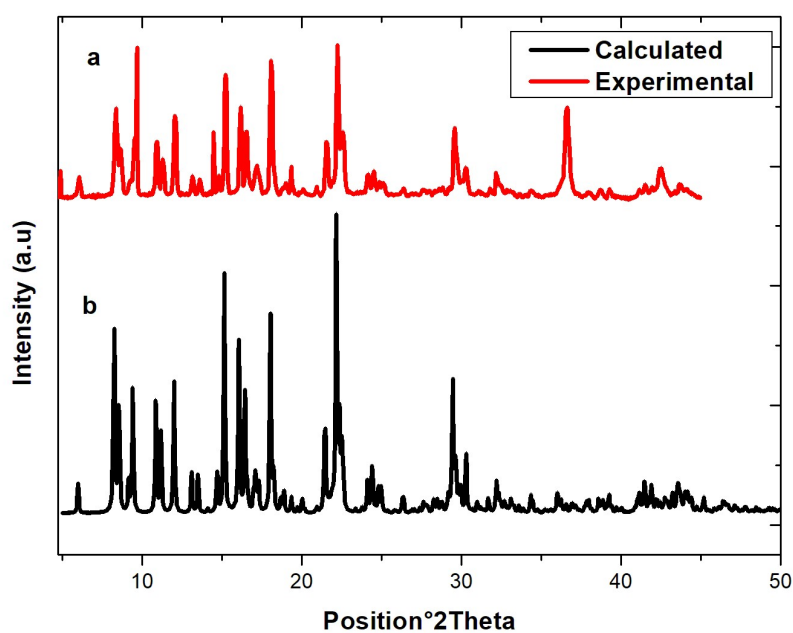

**Figure S4.** (a) PXR pattern of bulk  $\text{Cu}_3(\text{SDBA})_2(\text{HSDBA})$  (blue precipitate) denoted 'experimental'. (b) Calculated XRD pattern, the simulation being from the single XRD data.

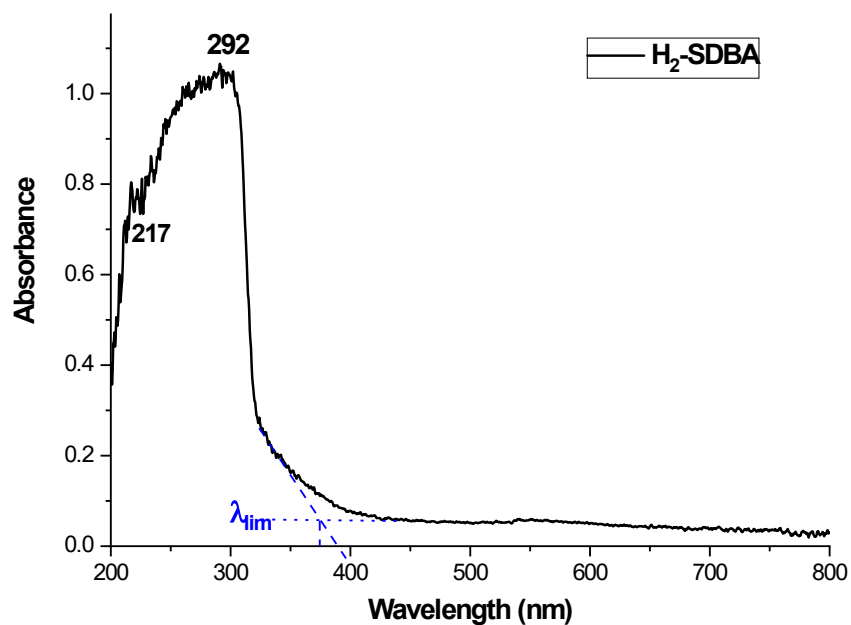

**Figure S5.** UV-vis absorption spectrum of the  $\text{H}_2\text{-SDBA}$  ligand. The  $\lambda_{\text{max}}$  of the two absorption bands and the  $\lambda_{\text{lim}}$  are indicated.

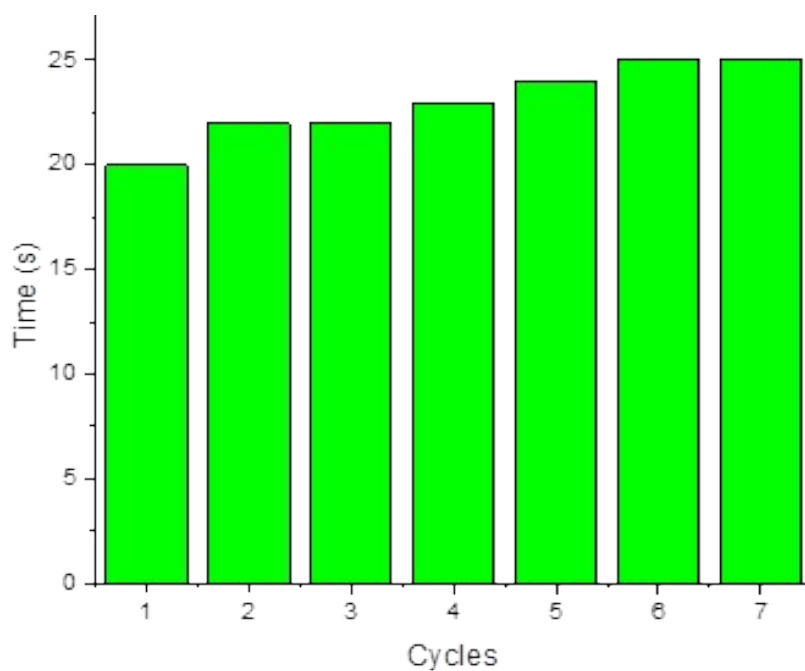

**Figure S6.** Time for the conversion of 4-NP catalyzed by re-used  $\text{Cu}_3(\text{SDBA})_2(\text{HSDBA})$  in the presence of aqueous  $\text{NaBH}_4$ , for 7 cycles. Conditions: 5 mL;  $[\text{4-NP}] = 7.1 \times 10^{-4} \text{ mol L}^{-1}$ ;  $[\text{NaBH}_4] = 2.1 \times 10^{-2} \text{ mol L}^{-1}$ ; 2 mg  $\text{Cu}_3(\text{SDBA})_2(\text{HSDBA})$ ; 25 °C.

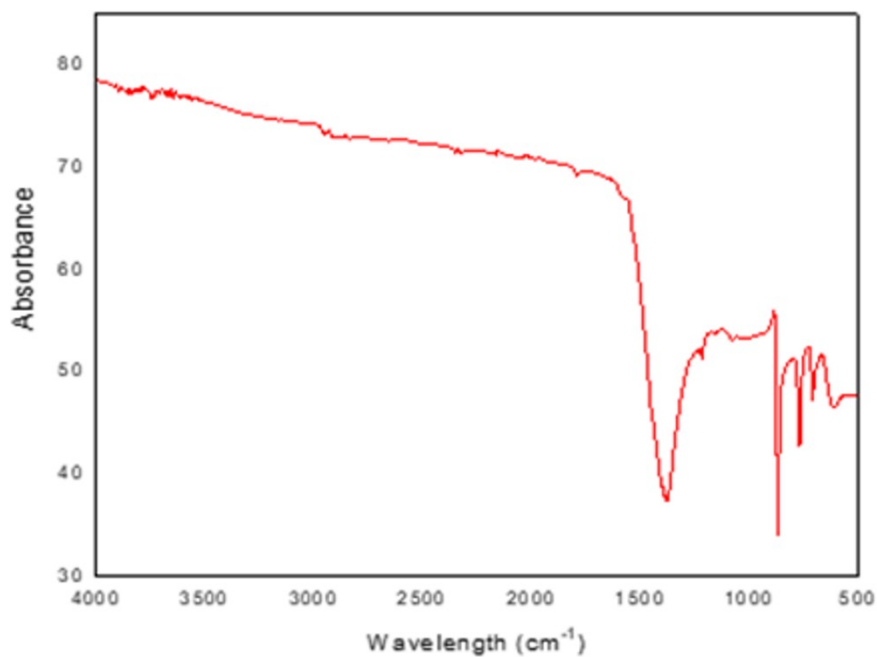

**Figure S7.** FTIR spectrum of used  $\text{Cu}_3(\text{SDBA})_2(\text{HSDBA})$ , that is,  $\text{Cu}_3(\text{SDBA})_2(\text{HSDBA})$  recovered after 7 cycles.

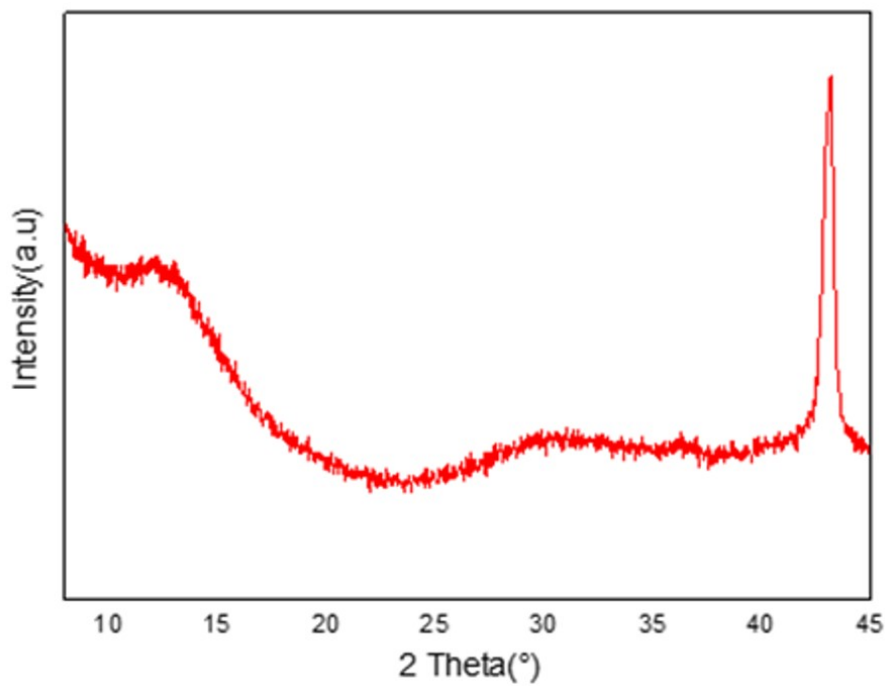

**Figure S8.** PXRD pattern of used  $\text{Cu}_3(\text{SDBA})_2(\text{HSDBA})$ , that is,  $\text{Cu}_3(\text{SDBA})_2(\text{HSDBA})$  recovered after 7 cycles. The peak at around 43.5° belongs to metallic Cu (the plane (111)).
